# Supplementary material
Source: MDPI journal article supplement (https://www.mdpi.com/2077-1312/10/4/451)
Supplement: s1 [file s1]

**Esposito et al., Table S3**  
**SIMPER 2016-2018 on structural pooled data**

**SIMPER**

Similarity Percentages - species contributions

**One-Way Analysis**

*Data worksheet*

Name: Data1

Data type: Abundance

Sample selection: All

Variable selection: All

*Parameters*

Resemblance: S17 Bray Curtis similarity

Cut off for low contributions: 50.00%

*Factor Groups*

| Sample | pH       |
|--------|----------|
| 1      | Ambient  |
| 2      | Ambient  |
| 3      | Ambient  |
| 4      | Ambient  |
| 12     | Ambient  |
| 13     | Ambient  |
| 14     | Ambient  |
| 15     | Ambient  |
| 5      | Weak low |
| 6      | Weak low |
| 7      | Weak low |
| 8      | Weak low |
| 16     | Weak low |
| 17     | Weak low |
| 18     | Weak low |
| 19     | Weak low |
| 9      | Low      |
| 10     | Low      |
| 11     | Low      |
| 20     | Low      |
| 21     | Low      |
| 22     | Low      |
| 23     | Low      |

**Group Ambient**

Average similarity: 51.23

| Species                      | Av.Abund | Av.Sim | Sim/SD | Contrib% | Cum.% |
|------------------------------|----------|--------|--------|----------|-------|
| Leptocheliidae               | 6.91     | 3.49   | 3.81   | 6.81     | 6.81  |
| <i>Caprella acanthifera</i>  | 5.63     | 3.31   | 2.29   | 6.45     | 13.27 |
| <i>Amphiglena aeoliensis</i> | 5.77     | 2.88   | 3.63   | 5.62     | 18.88 |
| <i>Ampithoe helleri</i>      | 4.62     | 2.80   | 4.90   | 5.46     | 24.34 |
| Exogoninae gen. spp.         | 7.12     | 2.75   | 2.57   | 5.37     | 29.72 |
| Janiridae                    | 4.85     | 2.34   | 3.96   | 4.56     | 34.28 |
| <i>Hippolyte leptocerus</i>  | 3.37     | 2.18   | 3.53   | 4.25     | 38.53 |
| <i>Ampithoe ramondi</i>      | 3.05     | 1.82   | 3.73   | 3.56     | 42.09 |

|                                |      |      |      |      |       |
|--------------------------------|------|------|------|------|-------|
| <i>Odontosyllis ctenostoma</i> | 3.18 | 1.51 | 3.71 | 2.94 | 45.03 |
| <i>Apherusa vexatrix</i>       | 3.77 | 1.44 | 1.19 | 2.80 | 47.83 |
| <i>Rissoa variabilis</i>       | 2.64 | 1.24 | 3.23 | 2.42 | 50.26 |

#### **Group Weak low**

Average similarity: 56.51

| Species                        | Av.Abund | Av.Sim | Sim/SD | Contrib% | Cum.% |
|--------------------------------|----------|--------|--------|----------|-------|
| Leptocheliidae                 | 13.93    | 7.19   | 4.68   | 12.72    | 12.72 |
| <i>Amphiglena aeoliensis</i>   | 10.40    | 4.76   | 2.35   | 8.42     | 21.15 |
| <i>Caprella acanthifera</i>    | 6.60     | 3.46   | 3.64   | 6.13     | 27.27 |
| Exogoninae gen. spp.           | 7.69     | 2.99   | 1.69   | 5.29     | 32.57 |
| <i>Odontosyllis ctenostoma</i> | 4.52     | 2.26   | 2.73   | 4.00     | 36.56 |
| <i>Apherusa vexatrix</i>       | 3.93     | 2.08   | 3.78   | 3.68     | 40.24 |
| <i>Ampithoe helleri</i>        | 3.73     | 1.86   | 1.65   | 3.29     | 43.53 |
| Janiridae                      | 4.46     | 1.69   | 1.48   | 2.99     | 46.52 |
| <i>Ampithoe ferox</i>          | 3.07     | 1.55   | 2.46   | 2.74     | 49.26 |
| <i>Ampithoe riedli</i>         | 3.03     | 1.45   | 1.45   | 2.56     | 51.82 |

#### **Group Low**

Average similarity: 52.29

| Species                        | Av.Abund | Av.Sim | Sim/SD | Contrib% | Cum.% |
|--------------------------------|----------|--------|--------|----------|-------|
| Leptocheliidae                 | 20.58    | 10.35  | 2.70   | 19.79    | 19.79 |
| <i>Amphiglena panarensis</i>   | 13.45    | 6.34   | 1.92   | 12.12    | 31.91 |
| Exogoninae gen. spp.           | 8.77     | 3.92   | 3.40   | 7.50     | 39.41 |
| <i>Caprella acanthifera</i>    | 4.39     | 2.32   | 1.24   | 4.44     | 43.85 |
| <i>Odontosyllis ctenostoma</i> | 3.74     | 2.23   | 5.16   | 4.27     | 48.12 |
| <i>Amphipholis squamata</i>    | 4.27     | 2.18   | 3.75   | 4.17     | 52.30 |

#### **Groups Ambient & Weak low**

Average dissimilarity = 49.51

| Species                                  | Group Ambient |        | Group Weak low |        | Contrib% | Cum.% |
|------------------------------------------|---------------|--------|----------------|--------|----------|-------|
|                                          | Av.Abund      | Av.Sim | Av.Abund       | Av.Sim |          |       |
| Leptocheliidae                           | 6.91          | 13.93  | 2.58           | 1.61   | 5.22     | 5.22  |
| <i>Amphiglena aeoliensis</i>             | 5.77          | 10.40  | 2.00           | 1.08   | 4.04     | 9.26  |
| Exogoninae gen. spp.                     | 7.12          | 7.69   | 1.74           | 1.37   | 3.51     | 12.77 |
| <i>Stenothoe elachista</i>               | 3.58          | 3.78   | 1.26           | 1.33   | 2.54     | 15.31 |
| <i>Cressa cristata</i>                   | 4.18          | 0.47   | 1.22           | 1.03   | 2.46     | 17.77 |
| <i>Amphipholis squamata</i>              | 4.16          | 2.57   | 0.98           | 1.26   | 1.99     | 19.76 |
| <i>Musculus costulatus</i>               | 4.27          | 2.89   | 0.98           | 1.22   | 1.98     | 21.74 |
| Janiridae                                | 4.85          | 4.46   | 0.95           | 1.34   | 1.92     | 23.66 |
| <i>Protohyale (Boreohyale) camptonyx</i> | 3.40          | 3.25   | 0.93           | 1.63   | 1.88     | 25.54 |
| <i>Amphiglena panarensis</i>             | 2.63          | 3.28   | 0.86           | 1.30   | 1.74     | 27.28 |
| <i>Pereionotus testudo</i>               | 1.46          | 3.32   | 0.84           | 1.43   | 1.70     | 28.98 |
| <i>Erichthonius punctatus</i>            | 1.58          | 3.07   | 0.84           | 1.31   | 1.70     | 30.68 |
| <i>Caprella acanthifera</i>              | 5.63          | 6.60   | 0.82           | 1.27   | 1.65     | 32.33 |
| <i>Odontosyllis ctenostoma</i>           | 3.18          | 4.52   | 0.80           | 1.41   | 1.61     | 33.94 |
| <i>Apherusa vexatrix</i>                 | 3.77          | 3.93   | 0.79           | 1.29   | 1.60     | 35.54 |
| <i>Achelia echinata</i>                  | 1.72          | 2.87   | 0.73           | 1.16   | 1.47     | 37.01 |
| <i>Odostomia turrita</i>                 | 1.67          | 2.77   | 0.72           | 1.23   | 1.46     | 38.47 |
| <i>Cymodoce truncata</i>                 | 2.39          | 0.43   | 0.66           | 0.95   | 1.34     | 39.81 |
| <i>Cestopagurus timidus</i>              | 2.44          | 0.58   | 0.65           | 1.44   | 1.32     | 41.13 |
| <i>Granulina marginata</i>               | 1.33          | 2.63   | 0.65           | 1.46   | 1.31     | 42.44 |
| <i>Callipallene producta</i>             | 2.08          | 0.39   | 0.64           | 1.53   | 1.30     | 43.74 |

|                              |      |      |      |      |      |       |
|------------------------------|------|------|------|------|------|-------|
| <i>Callipallene phantoma</i> | 2.42 | 1.13 | 0.62 | 1.56 | 1.26 | 45.00 |
| <i>Sphaeromatidae</i> unid.  | 1.32 | 1.22 | 0.58 | 1.14 | 1.18 | 46.18 |
| <i>Nereiphylla pusilla</i>   | 0.73 | 2.43 | 0.58 | 1.63 | 1.16 | 47.34 |
| <i>Ampithoe ferox</i>        | 2.28 | 3.07 | 0.57 | 1.08 | 1.15 | 48.49 |
| <i>Syllis prolifera</i>      | 1.99 | 2.80 | 0.56 | 1.16 | 1.14 | 49.62 |

**Groups Ambient & Low**

**Average dissimilarity = 57.35**

| Species                                  | Group Ambient<br>Av.Abund | Group Low<br>Av.Abund | Av.Diss | Diss/SD | Contrib% | Cum.% |
|------------------------------------------|---------------------------|-----------------------|---------|---------|----------|-------|
| <i>Leptocheliidae</i>                    | 6.91                      | 20.58                 | 4.93    | 1.51    | 8.60     | 8.60  |
| <i>Amphiglena panarensis</i>             | 2.63                      | 13.45                 | 3.92    | 1.62    | 6.83     | 15.43 |
| <i>Exogoninae</i> gen. spp.              | 7.12                      | 8.77                  | 1.98    | 1.27    | 3.46     | 18.89 |
| <i>Amphiglena aeoliensis</i>             | 5.77                      | 3.91                  | 1.96    | 1.43    | 3.42     | 22.32 |
| <i>Stenothoe elachista</i>               | 3.58                      | 4.98                  | 1.59    | 1.52    | 2.77     | 25.09 |
| <i>Cressa cristata</i>                   | 4.18                      | 0.00                  | 1.28    | 0.93    | 2.24     | 27.32 |
| <i>Janiridae</i>                         | 4.85                      | 1.95                  | 1.26    | 1.87    | 2.19     | 29.51 |
| <i>Amphipholis squamata</i>              | 4.16                      | 4.27                  | 1.21    | 1.65    | 2.11     | 31.62 |
| <i>Musculus costulatus</i>               | 4.27                      | 0.83                  | 1.17    | 1.17    | 2.05     | 33.67 |
| <i>Protohyale (Boreohyale) camptonyx</i> | 3.40                      | 2.86                  | 0.98    | 1.86    | 1.71     | 35.38 |
| <i>Ampithoe helleri</i>                  | 4.62                      | 2.37                  | 0.96    | 1.53    | 1.67     | 37.04 |
| <i>Caprella acanthifera</i>              | 5.63                      | 4.39                  | 0.96    | 1.20    | 1.67     | 38.71 |
| <i>Pereionotus testudo</i>               | 1.46                      | 3.71                  | 0.95    | 1.04    | 1.66     | 40.38 |
| <i>Apherusa vexatrix</i>                 | 3.77                      | 2.07                  | 0.95    | 1.56    | 1.66     | 42.03 |
| <i>Granulina marginata</i>               | 1.33                      | 3.43                  | 0.93    | 1.27    | 1.62     | 43.66 |
| <i>Callipallene phantoma</i>             | 2.42                      | 0.20                  | 0.77    | 1.53    | 1.35     | 45.00 |
| <i>Callipallene producta</i>             | 2.08                      | 0.20                  | 0.75    | 1.53    | 1.31     | 46.31 |
| <i>Achelia langi</i>                     | 2.37                      | 0.45                  | 0.74    | 1.46    | 1.30     | 47.61 |
| <i>Cestopagurus timidus</i>              | 2.44                      | 0.55                  | 0.70    | 1.32    | 1.23     | 48.84 |
| <i>Cymodoce truncata</i>                 | 2.39                      | 0.14                  | 0.70    | 0.91    | 1.22     | 50.06 |

**Groups Weak low & Low**

**Average dissimilarity = 49.75**

| Species                       | Group Weak low<br>Av.Abund | Group Low<br>Av.Abund | Av.Diss | Diss/SD | Contrib% | Cum.% |
|-------------------------------|----------------------------|-----------------------|---------|---------|----------|-------|
| <i>Amphiglena panarensis</i>  | 3.28                       | 13.45                 | 3.59    | 1.69    | 7.23     | 7.23  |
| <i>Leptocheliidae</i>         | 13.93                      | 20.58                 | 3.42    | 1.56    | 6.87     | 14.09 |
| <i>Amphiglena aeoliensis</i>  | 10.40                      | 3.91                  | 2.84    | 1.60    | 5.72     | 19.81 |
| <i>Exogoninae</i> gen. spp.   | 7.69                       | 8.77                  | 1.90    | 1.36    | 3.81     | 23.62 |
| <i>Stenothoe elachista</i>    | 3.78                       | 4.98                  | 1.36    | 1.55    | 2.73     | 26.35 |
| <i>Janiridae</i>              | 4.46                       | 1.95                  | 1.25    | 1.52    | 2.51     | 28.86 |
| <i>Caprella acanthifera</i>   | 6.60                       | 4.39                  | 1.07    | 1.25    | 2.14     | 31.00 |
| <i>Pereionotus testudo</i>    | 3.32                       | 3.71                  | 0.96    | 1.30    | 1.93     | 32.93 |
| <i>Erichthonius punctatus</i> | 3.07                       | 0.91                  | 0.95    | 1.26    | 1.91     | 34.84 |
| <i>Ampithoe helleri</i>       | 3.73                       | 2.37                  | 0.83    | 1.42    | 1.67     | 36.52 |
| <i>Amphipholis squamata</i>   | 2.57                       | 4.27                  | 0.79    | 1.48    | 1.60     | 38.11 |
| <i>Achelia echinata</i>       | 2.87                       | 1.03                  | 0.78    | 1.32    | 1.57     | 39.68 |
| <i>Musculus costulatus</i>    | 2.89                       | 0.83                  | 0.78    | 1.32    | 1.56     | 41.24 |
| <i>Odostomia turrita</i>      | 2.77                       | 1.31                  | 0.77    | 1.12    | 1.55     | 42.80 |
| <i>Ampithoe ferox</i>         | 3.07                       | 1.36                  | 0.75    | 1.21    | 1.51     | 44.31 |
| <i>Ampithoe riedli</i>        | 3.03                       | 1.58                  | 0.75    | 1.29    | 1.51     | 45.82 |
| <i>Apherusa vexatrix</i>      | 3.93                       | 2.07                  | 0.74    | 1.37    | 1.48     | 47.30 |
| <i>Granulina marginata</i>    | 2.63                       | 3.43                  | 0.69    | 1.29    | 1.39     | 48.69 |
| <i>Achelia langi</i>          | 2.03                       | 0.45                  | 0.67    | 1.38    | 1.34     | 50.04 |
