# Supplementary material
Source: MDPI journal article supplement (https://www.mdpi.com/2077-1312/10/4/451)
Supplement: s1 [file s1]

**Esposito et al., Table S4**  
**SIMPER on functional traits**

**SIMPER 2016**

SIMPER

Similarity Percentages - species contributions

One-Way Analysis

*Data worksheet*

Name: Data2

Data type: Abundance

Sample selection: 1-11

Variable selection: All

*Parameters*

Resemblance: S17 Bray-Curtis similarity

Cut off for low contributions: 70.00%

*Factor Groups*

| Sample | pH       |
|--------|----------|
| B1-16  | Ambient  |
| B1-16  | Ambient  |
| B1-16  | Ambient  |
| B116   | Ambient  |
| B2-16  | Weak low |
| B3-16  | Low      |
| B3-16  | Low      |
| B3-16  | Low      |

***Group Ambient***

Average similarity: 90.31

| Species                | Av.Abund | Av.Sim | Sim/SD | Contrib% | Cum.% |
|------------------------|----------|--------|--------|----------|-------|
| small size             | 5.50     | 6.97   | 18.99  | 7.72     | 7.72  |
| direct brooding        | 5.47     | 6.92   | 19.13  | 7.66     | 15.38 |
| weak-calcifiers        | 5.28     | 6.68   | 18.81  | 7.39     | 22.77 |
| crawler                | 4.95     | 6.20   | 18.41  | 6.87     | 29.64 |
| burrower/tubicolous    | 4.50     | 5.82   | 16.42  | 6.45     | 36.09 |
| omnivores              | 4.52     | 5.72   | 19.88  | 6.33     | 42.41 |
| herbivores             | 4.49     | 5.67   | 16.69  | 6.28     | 48.70 |
| non calcifiers         | 4.18     | 5.26   | 17.38  | 5.82     | 54.52 |
| indirect planktic      | 3.66     | 4.63   | 16.39  | 5.12     | 59.64 |
| medium size            | 3.68     | 4.55   | 15.91  | 5.03     | 64.68 |
| swimmer                | 3.65     | 4.27   | 11.08  | 4.73     | 69.41 |
| herbivore/detritivores | 3.53     | 4.13   | 13.09  | 4.58     | 73.98 |

***Group Weak low***

Average similarity: 91.83

| Species             | Av.Abund | Av.Sim | Sim/SD | Contrib% | Cum.% |
|---------------------|----------|--------|--------|----------|-------|
| small size          | 6.46     | 6.96   | 25.17  | 7.58     | 7.58  |
| direct brooding     | 6.40     | 6.87   | 19.73  | 7.48     | 15.06 |
| weak-calcifiers     | 5.90     | 6.35   | 41.37  | 6.92     | 21.98 |
| burrower/tubicolous | 5.97     | 6.25   | 11.58  | 6.80     | 28.78 |

|                             |      |      |       |      |       |
|-----------------------------|------|------|-------|------|-------|
| crawler                     | 5.34 | 5.88 | 56.85 | 6.40 | 35.18 |
| non calcifiers              | 5.55 | 5.75 | 9.89  | 6.27 | 41.45 |
| omnivores                   | 5.48 | 5.74 | 14.45 | 6.25 | 47.70 |
| herbivores                  | 4.76 | 5.20 | 47.29 | 5.67 | 53.37 |
| swimmer                     | 4.20 | 4.56 | 15.89 | 4.96 | 58.33 |
| indirect planktic           | 3.96 | 4.33 | 44.42 | 4.72 | 63.05 |
| medium size                 | 3.86 | 4.31 | 52.32 | 4.70 | 67.74 |
| omnivore/suspension feeders | 4.59 | 4.18 | 3.88  | 4.55 | 72.29 |

#### **Group Low**

Average similarity: 89.98

| Species                     | Av.Abund | Av.Sim | Sim/SD | Contrib% | Cum.% |
|-----------------------------|----------|--------|--------|----------|-------|
| direct brooding             | 6.16     | 7.90   | 20.76  | 8.78     | 8.78  |
| small size                  | 6.16     | 7.89   | 20.83  | 8.77     | 17.55 |
| burrower/tubicolous         | 5.83     | 7.36   | 20.75  | 8.17     | 25.73 |
| weak-calcifiers             | 5.49     | 6.89   | 17.93  | 7.65     | 33.38 |
| non calcifiers              | 5.37     | 6.57   | 9.45   | 7.31     | 40.69 |
| omnivores                   | 5.04     | 6.37   | 21.28  | 7.08     | 47.76 |
| crawler                     | 4.83     | 6.18   | 24.27  | 6.87     | 54.63 |
| omnivore/suspension feeders | 5.03     | 6.05   | 12.48  | 6.73     | 61.36 |
| herbivores                  | 3.78     | 4.48   | 22.93  | 4.98     | 66.34 |
| herbivore/detritivores      | 3.82     | 4.30   | 3.57   | 4.77     | 71.12 |

#### **Groups Ambient & Weak low**

Average dissimilarity = 12.29

| Species                     | Group Ambient | Group Weak low |         | Diss/SD | Contrib% | Cum.% |
|-----------------------------|---------------|----------------|---------|---------|----------|-------|
|                             | Av.Abund      | Av.Abund       | Av.Diss |         |          |       |
| omnivore/suspension feeders | 3.17          | 4.59           | 0.93    | 1.27    | 7.55     | 7.55  |
| burrower/tubicolous         | 4.50          | 5.97           | 0.89    | 2.14    | 7.28     | 14.83 |
| non calcifiers              | 4.18          | 5.55           | 0.85    | 1.86    | 6.88     | 21.71 |
| crawler/climber             | 2.32          | 1.12           | 0.74    | 2.06    | 6.01     | 27.72 |
| indirect/benthic            | 2.10          | 3.23           | 0.71    | 1.58    | 5.77     | 33.49 |
| deposit/suspension feeders  | 1.45          | 1.72           | 0.63    | 1.47    | 5.09     | 38.58 |
| omnivores                   | 4.52          | 5.48           | 0.62    | 1.75    | 5.03     | 43.61 |
| small size                  | 5.50          | 6.46           | 0.62    | 1.90    | 5.00     | 48.62 |
| direct brooding             | 5.47          | 6.40           | 0.61    | 1.82    | 4.94     | 53.55 |
| detritivores                | 2.00          | 2.38           | 0.54    | 1.32    | 4.42     | 57.97 |
| sessile                     | 1.72          | 1.02           | 0.52    | 1.61    | 4.27     | 62.24 |
| carnivores                  | 1.83          | 2.64           | 0.52    | 1.42    | 4.21     | 66.45 |
| herbivore/detritivores      | 3.53          | 3.96           | 0.48    | 1.74    | 3.92     | 70.37 |

#### **Groups Ambient & Low**

Average dissimilarity = 14.63

| Species                     | Group Ambient | Group Low | Av.Diss | Diss/SD | Contrib% | Cum.% |
|-----------------------------|---------------|-----------|---------|---------|----------|-------|
|                             | Av.Abund      | Av.Abund  |         |         |          |       |
| crawler/climber             | 2.32          | 0.23      | 1.37    | 3.32    | 9.33     | 9.33  |
| parasites                   | 3.25          | 1.39      | 1.24    | 2.41    | 8.45     | 17.78 |
| omnivore/suspension feeders | 3.17          | 5.03      | 1.23    | 2.92    | 8.44     | 26.21 |
| deposit/suspension feeders  | 1.45          | 2.79      | 1.11    | 1.47    | 7.57     | 33.78 |
| sessile                     | 1.72          | 0.23      | 0.98    | 1.98    | 6.73     | 40.52 |
| burrower/tubicolous         | 4.50          | 5.83      | 0.88    | 3.72    | 6.03     | 46.55 |
| non calcifiers              | 4.18          | 5.37      | 0.80    | 1.94    | 5.44     | 51.99 |
| detritivores                | 2.00          | 2.37      | 0.66    | 1.41    | 4.51     | 56.50 |
| herbivore/detritivores      | 3.53          | 3.82      | 0.58    | 1.62    | 3.98     | 60.48 |
| burrower                    | 0.00          | 0.92      | 0.58    | 0.68    | 3.94     | 64.42 |
| herbivores                  | 4.49          | 3.78      | 0.51    | 1.61    | 3.52     | 67.94 |
| indirect/benthic            | 2.10          | 1.43      | 0.49    | 1.57    | 3.37     | 71.31 |

**Groups Weak low & Low**  
**Average dissimilarity = 12.34**

| Species                     | Group Weak low<br>Av.Abund | Group Low<br>Av.Abund | Av.Diss | Diss/SD | Contrib% | Cum.% |
|-----------------------------|----------------------------|-----------------------|---------|---------|----------|-------|
| parasites                   | 3.81                       | 1.39                  | 1.49    | 2.83    | 12.04    | 12.04 |
| indirect/benthic            | 3.23                       | 1.43                  | 1.10    | 2.65    | 8.95     | 20.99 |
| omnivore/suspension feeders | 4.59                       | 5.03                  | 0.75    | 1.58    | 6.08     | 27.07 |
| burrower                    | 0.79                       | 0.92                  | 0.71    | 1.35    | 5.73     | 32.80 |
| deposit/suspension feeders  | 1.72                       | 2.79                  | 0.63    | 0.97    | 5.09     | 37.89 |
| heavy calcifiers            | 3.86                       | 2.87                  | 0.61    | 1.90    | 4.96     | 42.85 |
| herbivores                  | 4.76                       | 3.78                  | 0.61    | 1.86    | 4.93     | 47.78 |
| swimmer                     | 4.20                       | 3.23                  | 0.59    | 2.16    | 4.75     | 52.53 |
| indirect planktic           | 3.96                       | 3.09                  | 0.55    | 1.53    | 4.48     | 57.01 |
| crawler/climber             | 1.12                       | 0.23                  | 0.54    | 1.89    | 4.38     | 61.39 |
| sessile                     | 1.02                       | 0.23                  | 0.49    | 1.52    | 3.96     | 65.35 |
| non calcifiers              | 5.55                       | 5.37                  | 0.42    | 1.31    | 3.39     | 68.74 |
| detritivores                | 2.38                       | 2.37                  | 0.42    | 1.54    | 3.37     | 72.10 |

**SIMPER 2018**

SIMPER  
 Similarity Percentages - species contributions

One-Way Analysis

*Data worksheet*

Name: Data2

Data type: Abundance

Sample selection: 12-23

Variable selection: All

*Parameters*

Resemblance: S17 Bray-Curtis similarity

Cut off for low contributions: 70.00%

*Factor Groups*

| Sample | pH       |
|--------|----------|
| B1-18  | Ambient  |
| B2-18  | Weak low |
| B3-18  | Low      |
| B3-18  | Low      |
| B3-18  | Low      |
| B3-18  | Low      |

**Group Ambient**

Average similarity: 91.23

| Species         | Av.Abund | Av.Sim | Sim/SD | Contrib% | Cum.% |
|-----------------|----------|--------|--------|----------|-------|
| small size      | 6.63     | 6.15   | 23.67  | 6.75     | 6.75  |
| direct brooding | 6.63     | 6.13   | 23.56  | 6.72     | 13.46 |
| crawler         | 6.25     | 5.70   | 20.77  | 6.25     | 19.71 |
| weak-calcifiers | 6.14     | 5.63   | 20.62  | 6.17     | 25.88 |
| non calcifiers  | 5.66     | 5.29   | 19.83  | 5.80     | 31.68 |

|                             |      |      |       |      |       |
|-----------------------------|------|------|-------|------|-------|
| burrower/tubicolous         | 5.45 | 5.06 | 22.98 | 5.54 | 37.23 |
| herbivore/detritivores      | 5.39 | 4.89 | 15.10 | 5.36 | 42.58 |
| omnivores                   | 5.29 | 4.74 | 23.67 | 5.20 | 47.78 |
| herbivores                  | 5.00 | 4.62 | 20.64 | 5.06 | 52.85 |
| omnivore/suspension feeders | 5.10 | 4.59 | 7.22  | 5.03 | 57.88 |
| heavy calcifiers            | 5.02 | 4.42 | 17.41 | 4.84 | 62.72 |
| medium size                 | 5.00 | 4.38 | 17.82 | 4.80 | 67.52 |
| indirect planktic           | 4.83 | 4.34 | 21.23 | 4.76 | 72.28 |

**Group Weak low**

Average similarity: 92.84

| Species                     | Av.Abund | Av.Sim | Sim/SD | Contrib% | Cum.% |
|-----------------------------|----------|--------|--------|----------|-------|
| small size                  | 6.69     | 6.63   | 36.49  | 7.14     | 7.14  |
| direct brooding             | 6.66     | 6.60   | 36.02  | 7.11     | 14.25 |
| weak-calcifiers             | 6.21     | 6.12   | 35.86  | 6.59     | 20.84 |
| crawler                     | 6.06     | 6.04   | 33.89  | 6.50     | 27.35 |
| burrower/tubicolous         | 5.99     | 5.85   | 25.97  | 6.30     | 33.65 |
| omnivores                   | 5.87     | 5.75   | 29.16  | 6.19     | 39.84 |
| non calcifiers              | 5.77     | 5.74   | 32.80  | 6.18     | 46.02 |
| herbivore/detritivores      | 5.29     | 5.21   | 27.57  | 5.61     | 51.63 |
| omnivore/suspension feeders | 4.82     | 4.74   | 8.41   | 5.10     | 56.73 |
| herbivores                  | 4.70     | 4.68   | 24.65  | 5.04     | 61.77 |
| indirect planktic           | 4.54     | 4.58   | 26.69  | 4.93     | 66.70 |
| medium size                 | 4.40     | 4.39   | 32.94  | 4.73     | 71.43 |

**Group Low**

Average similarity: 92.40

| Species                     | Av.Abund | Av.Sim | Sim/SD | Contrib% | Cum.% |
|-----------------------------|----------|--------|--------|----------|-------|
| small size                  | 7.31     | 7.24   | 35.50  | 7.83     | 7.83  |
| direct brooding             | 7.29     | 7.20   | 36.56  | 7.80     | 15.63 |
| burrower/tubicolous         | 7.04     | 6.98   | 34.10  | 7.56     | 23.19 |
| weak-calcifiers             | 6.87     | 6.83   | 30.08  | 7.39     | 30.58 |
| omnivores                   | 6.83     | 6.79   | 31.40  | 7.35     | 37.93 |
| non calcifiers              | 6.23     | 5.98   | 29.07  | 6.48     | 44.40 |
| crawler                     | 6.00     | 5.75   | 35.59  | 6.23     | 50.63 |
| omnivore/suspension feeders | 5.38     | 4.89   | 4.97   | 5.30     | 55.93 |
| heavy calcifiers            | 4.58     | 4.55   | 38.91  | 4.92     | 60.85 |
| herbivores                  | 4.57     | 4.54   | 32.47  | 4.92     | 65.77 |
| herbivore/detritivores      | 4.86     | 4.44   | 38.37  | 4.81     | 70.57 |

**Groups Ambient & Weak low**

Average dissimilarity = 9.14

| Species                   | Group Ambient |          | Group Weak low |         | Contrib% | Cum.% |
|---------------------------|---------------|----------|----------------|---------|----------|-------|
|                           | Av.Abund      | Av.Abund | Av.Diss        | Diss/SD |          |       |
| detritivores              | 4.75          | 2.87     | 0.98           | 1.98    | 10.71    | 10.71 |
| deposit/supension feeders | 1.97          | 3.58     | 0.82           | 1.27    | 9.00     | 19.71 |
| crawler/climber           | 2.14          | 0.75     | 0.74           | 1.54    | 8.15     | 27.86 |
| swimmer                   | 4.61          | 3.53     | 0.54           | 2.21    | 5.94     | 33.80 |
| indirect/benthic          | 3.43          | 2.55     | 0.51           | 1.49    | 5.61     | 39.41 |
| heavy calcifiers          | 5.02          | 4.22     | 0.46           | 1.35    | 5.00     | 44.41 |
| sessile                   | 3.73          | 3.14     | 0.42           | 1.03    | 4.54     | 48.95 |
| omnivores                 | 5.29          | 5.87     | 0.41           | 1.56    | 4.50     | 53.45 |
| burrower                  | 0.35          | 0.79     | 0.37           | 1.35    | 4.10     | 57.55 |
| medium size               | 5.00          | 4.40     | 0.35           | 1.06    | 3.82     | 61.37 |
| large size                | 1.98          | 1.47     | 0.35           | 1.70    | 3.81     | 65.18 |
| burrower/tubicolous       | 5.45          | 5.99     | 0.34           | 1.48    | 3.75     | 68.94 |
| parasites                 | 3.99          | 3.34     | 0.34           | 1.82    | 3.74     | 72.68 |

**Groups Ambient & Low**  
**Average dissimilarity = 12.38**

|                             | Group Ambient | Group Low |         |         |          |       |
|-----------------------------|---------------|-----------|---------|---------|----------|-------|
| Species                     | Av.Abund      | Av.Abund  | Av.Diss | Diss/SD | Contrib% | Cum.% |
| sessile                     | 3.73          | 1.12      | 1.30    | 2.20    | 10.47    | 10.47 |
| crawler/climber             | 2.14          | 0.00      | 1.06    | 2.39    | 8.60     | 19.07 |
| swimmer                     | 4.61          | 2.57      | 1.02    | 5.92    | 8.21     | 27.27 |
| burrower/tubicolous         | 5.45          | 7.04      | 0.80    | 2.85    | 6.49     | 33.76 |
| omnivores                   | 5.29          | 6.83      | 0.78    | 2.09    | 6.33     | 40.10 |
| parasites                   | 3.99          | 2.70      | 0.65    | 2.11    | 5.25     | 45.35 |
| detritivores                | 4.75          | 3.64      | 0.62    | 1.51    | 4.98     | 50.33 |
| burrower                    | 0.35          | 1.39      | 0.62    | 1.63    | 4.97     | 55.30 |
| deposit/suspension feeders  | 1.97          | 2.14      | 0.49    | 1.21    | 3.95     | 59.25 |
| herbivore/detritivores      | 5.39          | 4.86      | 0.47    | 1.63    | 3.83     | 63.08 |
| omnivore/suspension feeders | 5.10          | 5.38      | 0.47    | 1.60    | 3.76     | 66.84 |
| medium size                 | 5.00          | 4.31      | 0.43    | 1.25    | 3.46     | 70.30 |

**Groups Weak low & Low**  
**Average dissimilarity = 9.54**

|                             | Group Weak low | Group Low |         |         |          |       |
|-----------------------------|----------------|-----------|---------|---------|----------|-------|
| Species                     | Av.Abund       | Av.Abund  | Av.Diss | Diss/SD | Contrib% | Cum.% |
| sessile                     | 3.14           | 1.12      | 1.05    | 2.32    | 11.04    | 11.04 |
| deposit/suspension feeders  | 3.58           | 2.14      | 0.74    | 1.93    | 7.77     | 18.81 |
| burrower/tubicolous         | 5.99           | 7.04      | 0.55    | 1.72    | 5.76     | 24.56 |
| detritivores                | 2.87           | 3.64      | 0.55    | 1.48    | 5.75     | 30.31 |
| omnivores                   | 5.87           | 6.83      | 0.50    | 1.65    | 5.21     | 35.52 |
| omnivore/suspension feeders | 4.82           | 5.38      | 0.49    | 1.64    | 5.18     | 40.70 |
| swimmer                     | 3.53           | 2.57      | 0.49    | 2.19    | 5.14     | 45.84 |
| herbivore/detritivores      | 5.29           | 4.86      | 0.46    | 2.12    | 4.85     | 50.69 |
| indirect/benthic            | 2.55           | 3.20      | 0.46    | 1.43    | 4.79     | 55.48 |
| burrower                    | 0.79           | 1.39      | 0.45    | 1.31    | 4.75     | 60.23 |
| crawler/climber             | 0.75           | 0.00      | 0.38    | 1.29    | 3.98     | 64.21 |
| weak-calcifiers             | 6.21           | 6.87      | 0.37    | 1.44    | 3.87     | 68.09 |
| direct brooding             | 6.66           | 7.29      | 0.35    | 1.30    | 3.72     | 71.80 |

**SIMPER 2016 and 2018 pooled data**

**SIMPER**

Similarity Percentages - species contributions

**One-Way Analysis**

*Data worksheet*

Name: Data2

Data type: Abundance

Sample selection: All

Variable selection: All

*Parameters*

Resemblance: S17 Bray-Curtis similarity

Cut off for low contributions: 70.00%

*Factor Groups*

| Sample | pH      |
|--------|---------|
| B1-16  | Ambient |
| B1-16  | Ambient |
| B1-16  | Ambient |
| B116   | Ambient |

B1-18 Ambient  
 B1-18 Ambient  
 B1-18 Ambient  
 B1-18 Ambient  
 B2-16 Weak low  
 B2-16 Weak low  
 B2-16 Weak low  
 B2-16 Weak low  
 B2-18 Weak low  
 B3-16 Low  
 B3-16 Low  
 B3-16 Low  
 B3-18 Low  
 B3-18 Low  
 B3-18 Low  
 B3-18 Low

**Group Ambient**

Average similarity: 86.61

| Species                | Av.Abund | Av.Sim | Sim/SD | Contrib% | Cum.% |
|------------------------|----------|--------|--------|----------|-------|
| small size             | 6.06     | 6.36   | 13.28  | 7.34     | 7.34  |
| direct brooding        | 6.05     | 6.32   | 13.36  | 7.30     | 14.64 |
| weak-calcifiers        | 5.71     | 6.02   | 12.26  | 6.95     | 21.59 |
| crawler                | 5.60     | 5.74   | 13.36  | 6.62     | 28.21 |
| burrower/tubicolous    | 4.98     | 5.23   | 12.42  | 6.04     | 34.25 |
| omnivores              | 4.90     | 5.13   | 12.24  | 5.93     | 40.18 |
| herbivores             | 4.75     | 5.09   | 10.58  | 5.87     | 46.05 |
| non calcifiers         | 4.92     | 4.95   | 11.97  | 5.72     | 51.76 |
| indirect planktic      | 4.25     | 4.28   | 12.85  | 4.94     | 56.71 |
| medium size            | 4.34     | 4.28   | 12.44  | 4.94     | 61.65 |
| herbivore/detritivores | 4.46     | 4.20   | 6.52   | 4.84     | 66.49 |
| swimmer                | 4.13     | 4.17   | 9.13   | 4.81     | 71.30 |

**Group Weak low**

Average similarity: 91.10

| Species                     | Av.Abund | Av.Sim | Sim/SD | Contrib% | Cum.% |
|-----------------------------|----------|--------|--------|----------|-------|
| small size                  | 6.58     | 6.82   | 25.75  | 7.48     | 7.48  |
| direct brooding             | 6.53     | 6.75   | 23.03  | 7.41     | 14.90 |
| weak-calcifiers             | 6.06     | 6.26   | 28.22  | 6.87     | 21.77 |
| burrower/tubicolous         | 5.98     | 6.09   | 14.90  | 6.68     | 28.45 |
| crawler                     | 5.70     | 5.86   | 24.92  | 6.44     | 34.89 |
| non calcifiers              | 5.66     | 5.78   | 13.19  | 6.34     | 41.23 |
| omnivores                   | 5.67     | 5.77   | 16.37  | 6.33     | 47.57 |
| herbivores                  | 4.73     | 4.96   | 20.80  | 5.44     | 53.01 |
| herbivore/detritivores      | 4.62     | 4.46   | 7.40   | 4.89     | 57.90 |
| omnivore/suspension feeders | 4.71     | 4.45   | 5.03   | 4.88     | 62.78 |
| indirect planktic           | 4.25     | 4.37   | 17.90  | 4.79     | 67.57 |
| medium size                 | 4.13     | 4.26   | 24.45  | 4.68     | 72.25 |

**Group Low**

Average similarity: 87.74

| Species             | Av.Abund | Av.Sim | Sim/SD | Contrib% | Cum.% |
|---------------------|----------|--------|--------|----------|-------|
| small size          | 6.82     | 7.25   | 18.71  | 8.27     | 8.27  |
| direct brooding     | 6.81     | 7.25   | 18.60  | 8.26     | 16.53 |
| burrower/tubicolous | 6.52     | 6.89   | 18.83  | 7.85     | 24.37 |
| weak-calcifiers     | 6.28     | 6.55   | 15.46  | 7.47     | 31.84 |

|                             |      |      |       |      |       |
|-----------------------------|------|------|-------|------|-------|
| omnivores                   | 6.06 | 6.17 | 11.59 | 7.03 | 38.87 |
| non calcifiers              | 5.86 | 6.16 | 11.93 | 7.03 | 45.90 |
| crawler                     | 5.50 | 5.71 | 18.37 | 6.50 | 52.40 |
| omnivore/suspension feeders | 5.23 | 5.40 | 6.22  | 6.15 | 58.55 |
| herbivores                  | 4.23 | 4.42 | 13.63 | 5.03 | 63.59 |
| herbivore/detritivores      | 4.41 | 4.39 | 5.41  | 5.00 | 68.58 |
| medium size                 | 3.86 | 3.84 | 11.40 | 4.38 | 72.96 |

**Groups Ambient & Weak low**  
**Average dissimilarity = 12.04**

| Species                     | Group Ambient | Group Weak low |         |         |          |       |
|-----------------------------|---------------|----------------|---------|---------|----------|-------|
|                             | Av.Abund      | Av.Abund       | Av.Diss | Diss/SD | Contrib% | Cum.% |
| detritivores                | 3.38          | 2.62           | 0.86    | 1.61    | 7.16     | 7.16  |
| deposit/suspension feeders  | 1.71          | 2.65           | 0.83    | 1.36    | 6.90     | 14.06 |
| sessile                     | 2.72          | 2.08           | 0.79    | 1.41    | 6.60     | 20.66 |
| crawler/climber             | 2.23          | 0.94           | 0.75    | 1.67    | 6.21     | 26.87 |
| omnivore/suspension feeders | 4.14          | 4.71           | 0.72    | 1.35    | 5.99     | 32.85 |
| herbivore/detritivores      | 4.46          | 4.62           | 0.63    | 1.45    | 5.27     | 38.13 |
| burrower/tubicolous         | 4.98          | 5.98           | 0.63    | 1.60    | 5.22     | 43.35 |
| non calcifiers              | 4.92          | 5.66           | 0.58    | 1.32    | 4.78     | 48.14 |
| omnivores                   | 4.90          | 5.67           | 0.55    | 1.63    | 4.56     | 52.70 |
| heavy calcifiers            | 4.14          | 4.04           | 0.50    | 1.52    | 4.16     | 56.86 |
| indirect/benthic            | 2.77          | 2.89           | 0.49    | 1.30    | 4.05     | 60.90 |
| direct brooding             | 6.05          | 6.53           | 0.47    | 1.42    | 3.89     | 64.79 |
| small size                  | 6.06          | 6.58           | 0.46    | 1.40    | 3.81     | 68.61 |
| carnivores                  | 2.47          | 2.90           | 0.44    | 1.19    | 3.62     | 72.22 |

**Groups Ambient & Low**  
**Average dissimilarity = 15.91**

| Species                     | Group Ambient | Group Low |         |         |          |       |
|-----------------------------|---------------|-----------|---------|---------|----------|-------|
|                             | Av.Abund      | Av.Abund  | Av.Diss | Diss/SD | Contrib% | Cum.% |
| crawler/climber             | 2.23          | 0.10      | 1.21    | 2.75    | 7.57     | 7.57  |
| sessile                     | 2.72          | 0.74      | 1.15    | 1.62    | 7.22     | 14.79 |
| burrower/tubicolous         | 4.98          | 6.52      | 0.90    | 1.87    | 5.68     | 20.47 |
| parasites                   | 3.62          | 2.14      | 0.88    | 1.56    | 5.55     | 26.03 |
| detritivores                | 3.38          | 3.09      | 0.88    | 1.50    | 5.54     | 31.57 |
| omnivore/suspension feeders | 4.14          | 5.23      | 0.85    | 1.41    | 5.31     | 36.89 |
| omnivores                   | 4.90          | 6.06      | 0.75    | 1.46    | 4.72     | 41.61 |
| deposit/suspension feeders  | 1.71          | 2.42      | 0.73    | 1.27    | 4.61     | 46.22 |
| swimmer                     | 4.13          | 2.85      | 0.72    | 2.01    | 4.51     | 50.73 |
| herbivore/detritivores      | 4.46          | 4.41      | 0.68    | 1.54    | 4.28     | 55.01 |
| non calcifiers              | 4.92          | 5.86      | 0.68    | 1.39    | 4.26     | 59.26 |
| burrower                    | 0.17          | 1.19      | 0.65    | 1.13    | 4.08     | 63.34 |
| heavy calcifiers            | 4.14          | 3.85      | 0.64    | 1.43    | 4.04     | 67.37 |
| indirect/benthic            | 2.77          | 2.44      | 0.60    | 1.40    | 3.76     | 71.13 |

**Groups Weak low & Low**  
**Average dissimilarity = 11.47**

| Species                     | Group Weak low | Group Low |         |         |          |       |
|-----------------------------|----------------|-----------|---------|---------|----------|-------|
|                             | Av.Abund       | Av.Abund  | Av.Diss | Diss/SD | Contrib% | Cum.% |
| sessile                     | 2.08           | 0.74      | 0.87    | 1.42    | 7.62     | 7.62  |
| parasites                   | 3.57           | 2.14      | 0.84    | 1.38    | 7.29     | 14.91 |
| indirect/benthic            | 2.89           | 2.44      | 0.59    | 1.34    | 5.19     | 20.10 |
| omnivore/suspension feeders | 4.71           | 5.23      | 0.59    | 1.29    | 5.13     | 25.22 |
| deposit/suspension feeders  | 2.65           | 2.42      | 0.59    | 1.29    | 5.12     | 30.34 |
| swimmer                     | 3.87           | 2.85      | 0.58    | 1.90    | 5.05     | 35.39 |
| burrower                    | 0.79           | 1.19      | 0.56    | 1.29    | 4.89     | 40.28 |
| detritivores                | 2.62           | 3.09      | 0.56    | 1.55    | 4.89     | 45.17 |
| herbivore/detritivores      | 4.62           | 4.41      | 0.54    | 1.37    | 4.70     | 49.87 |

|                     |      |      |      |      |      |       |
|---------------------|------|------|------|------|------|-------|
| omnivores           | 5.67 | 6.06 | 0.54 | 1.64 | 4.68 | 54.55 |
| heavy calcifiers    | 4.04 | 3.85 | 0.48 | 1.49 | 4.22 | 58.77 |
| crawler/climber     | 0.94 | 0.10 | 0.47 | 1.67 | 4.14 | 62.91 |
| burrower/tubicolous | 5.98 | 6.52 | 0.46 | 1.42 | 4.04 | 66.95 |
| indirect planktic   | 4.25 | 3.83 | 0.43 | 1.17 | 3.71 | 70.65 |
