# Supplementary material
Source: MDPI journal article supplement (https://www.mdpi.com/2077-1312/10/4/451)

BOTTARO 2016 (structural analyses)

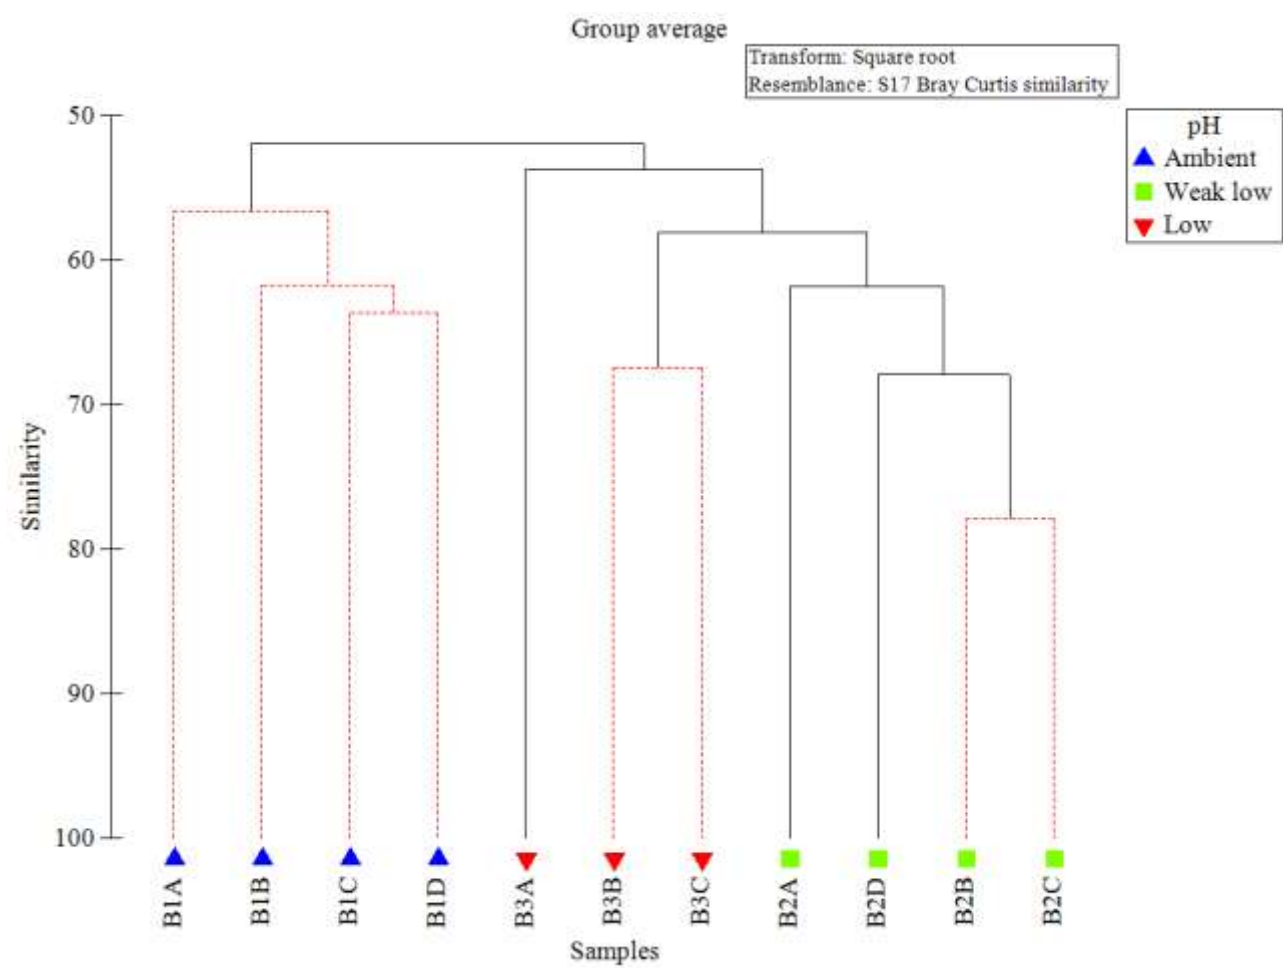

BOTTARO 2018 (structural analysis)

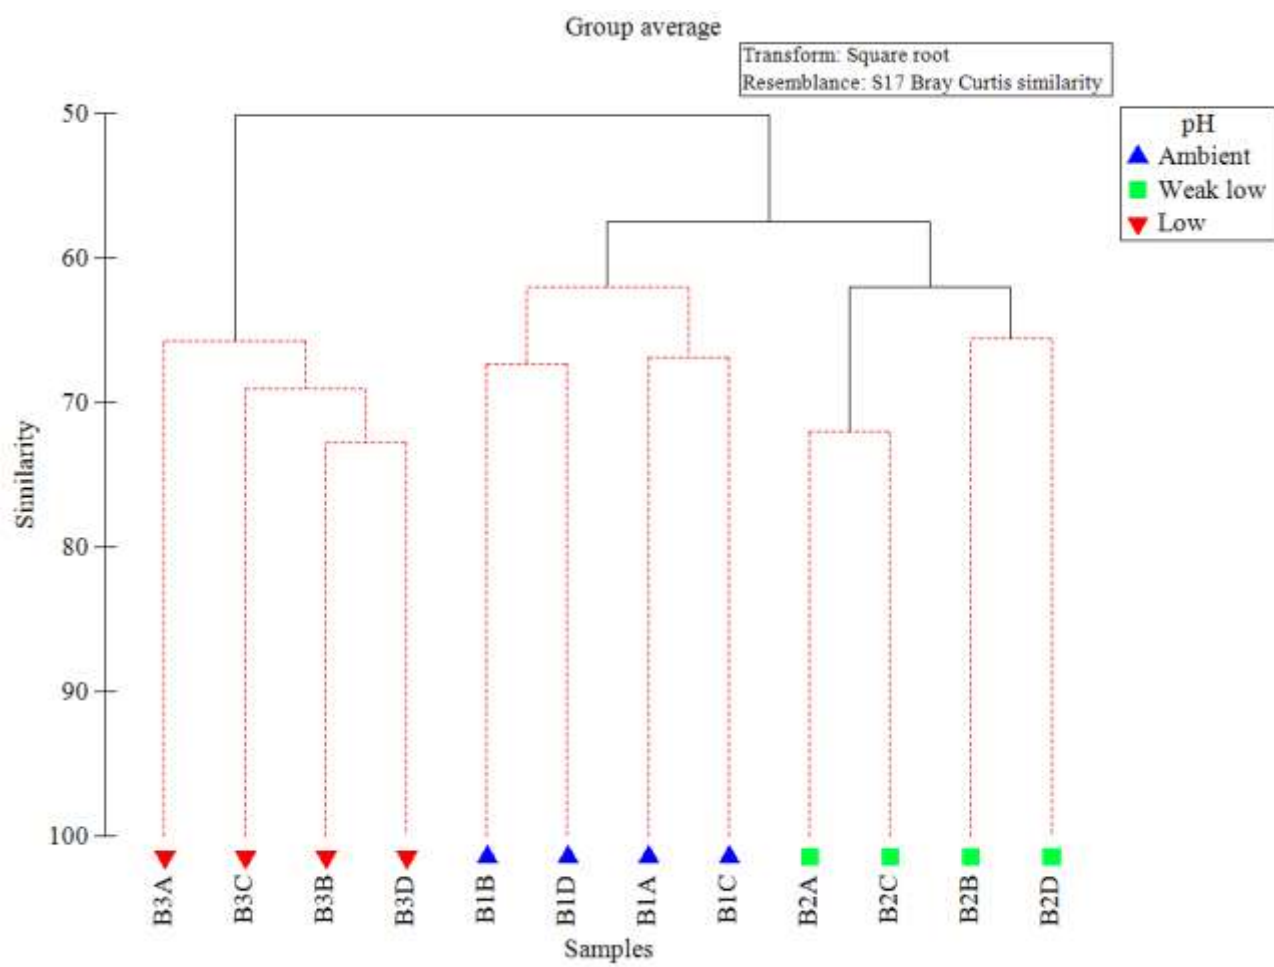

Supplement: s1 [file s1]
